# Supplementary material for: Mining of potential microRNAs with clinical correlation - regulation of syndecan-1 expression by miR-122-5p altered mobility of breast cancer cells and possible correlation with liver injury
Source: PubMed Central journal article supplement (PMC6021336; doi:10.18632/oncotarget.25589), 2018-06-15
Supplement: oncotarget-09-28165-s001.pdf [file oncotarget-09-28165-s001.pdf]

## Mining of potential microRNAs with clinical correlation - regulation of syndecan-1 expression by miR-122-5p altered mobility of breast cancer cells and possible correlation with liver injury

### SUPPLEMENTARY MATERIALS

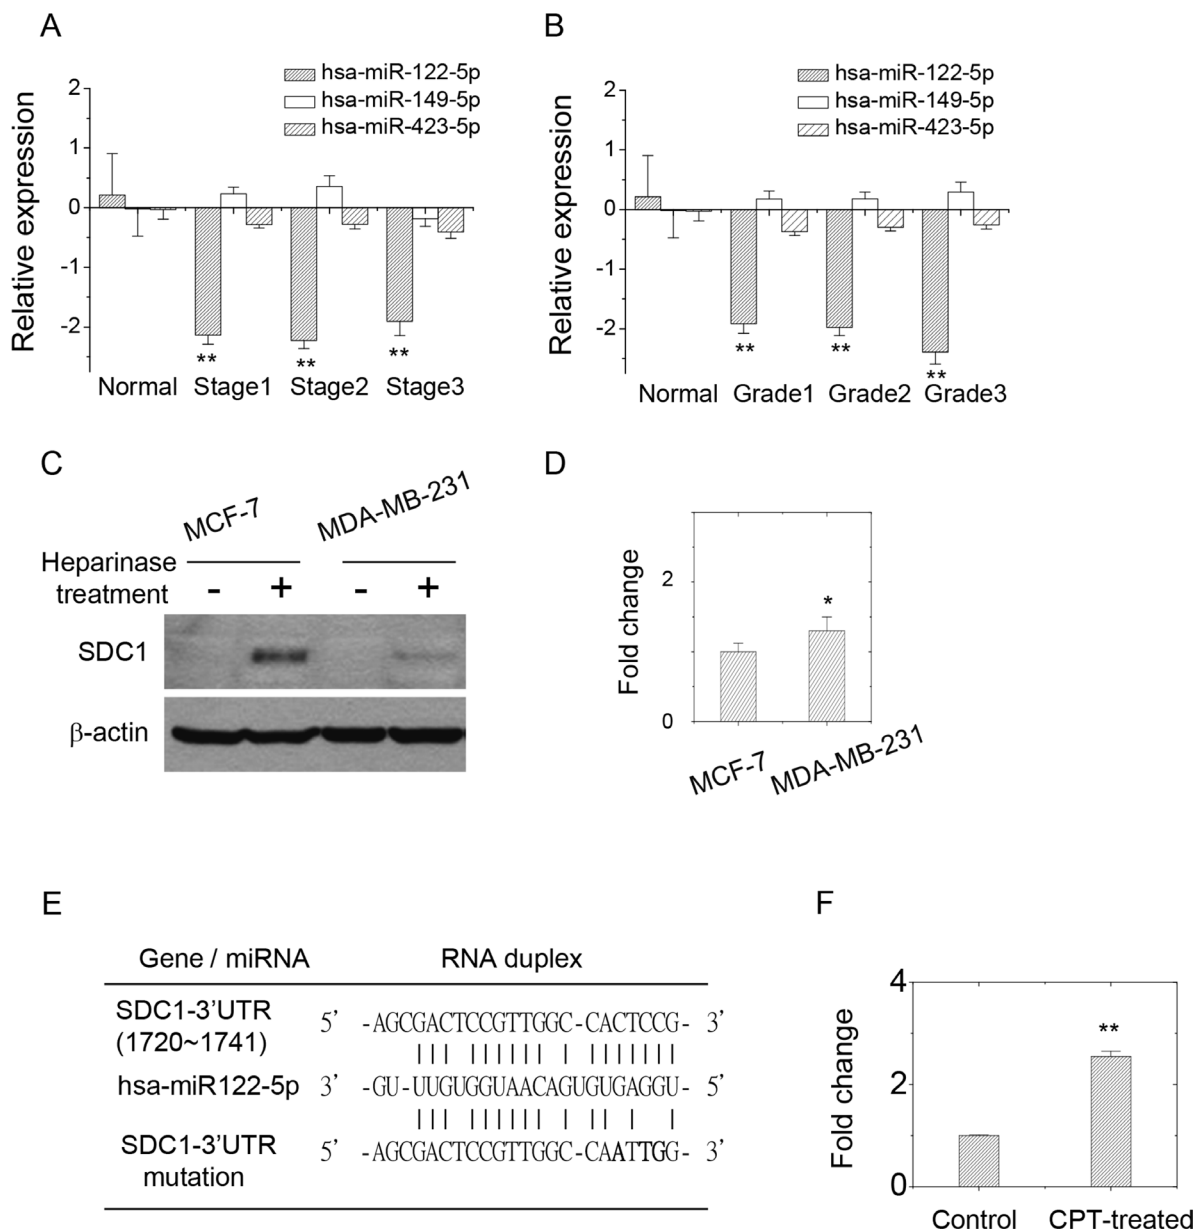

**Supplementary Figure 1:** Extracted data in GSE7842 for expression of miR-122-5p under (A) different patient stages and (B) tumor grades. Data were mean  $\pm$  S.E.  $**p < 0.01$ . (C) SDC1 protein expression in MCF-7 cells (ER<sup>+</sup>PR<sup>+</sup>; luminal type) was higher than MDA-MB-231 cells (triple negative; basal type). (D) The miR-122-5p expression level was relatively higher in MDA-MB-231 cell than in MCF-7 cells. Data were mean  $\pm$  S.E.  $**p < 0.05$ . (E) RNA duplex for hsa-miR-122-5p pairing with SDC1-3'UTR or SDC1-3'UTR mutated at seed region. (F) The miR-122-5p expression level in hepatoma cells was increased upon treatment of chemoagent camptothecin (CPT; in 10  $\mu$ M) as quantified by qPCR. Data were mean  $\pm$  S.E.  $**p < 0.05$ .

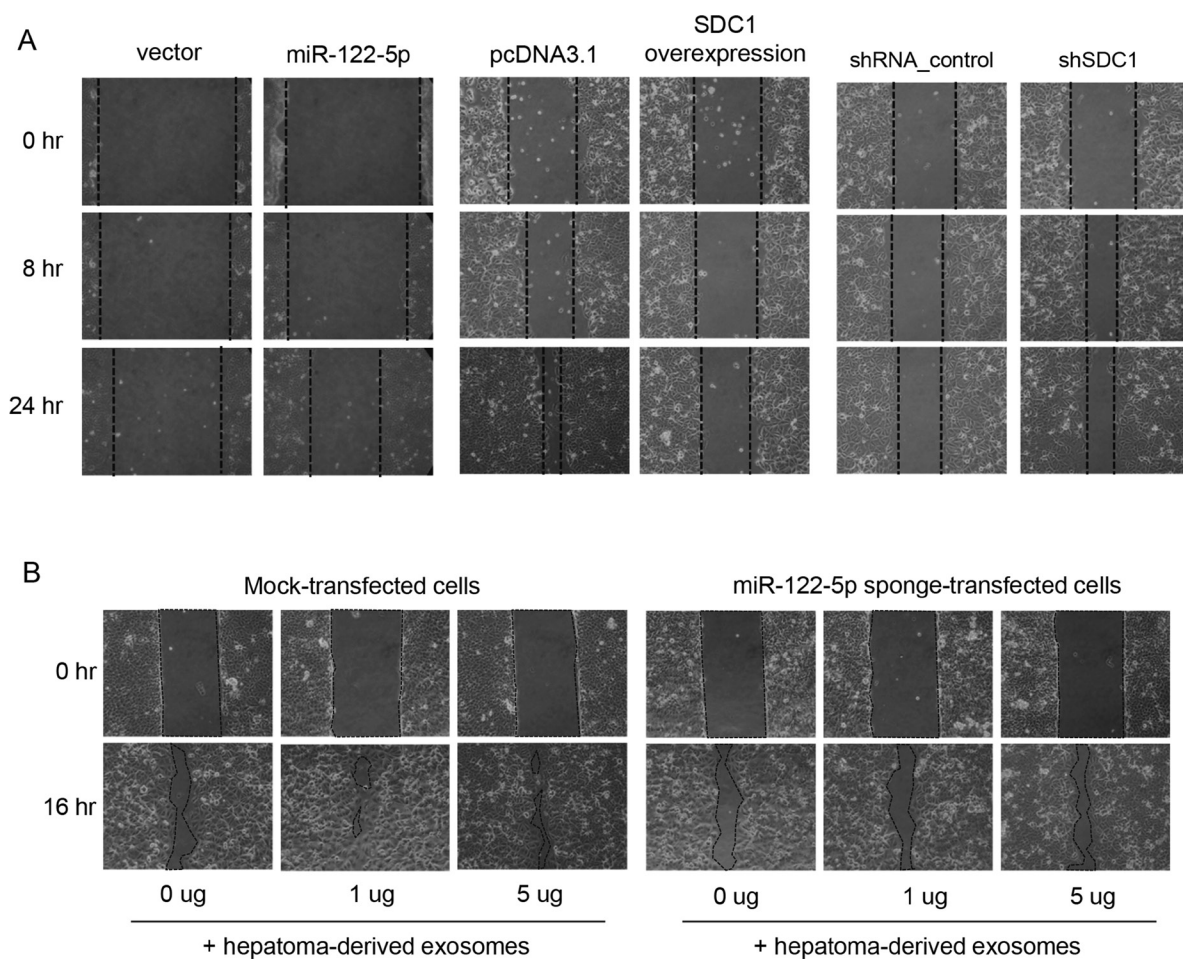

**Supplementary Figure 2:** (A) Effect of transfection of miRNA-122-5p, SDC1 construct, or shRNA against SDC1 on MCF7 cell mobility as observed by wound healing assay. (B) Effect of treatment of hepatoma-derived exosome at MCF7 cell mobility with or without miR-122-5p-specific inhibitor (miRNA sponge) as observed by wound healing assay.

**Supplementary Table 1: Primers used for construction of miR-122-5p overexpression plasmid, SDC1 overexpression plasmid, SDC1-3'UTR, SDC1-3'UTR mutation, miR-122-5p sponge, and PCR analysis of miR-122 expression**

| Primer                                   | Sequence                                                                                                  |
|------------------------------------------|-----------------------------------------------------------------------------------------------------------|
| Forward primer for miR-122-5p cloning    | 5'-cctgtgatagatctccttagcagagctgtggagtgtgacaatggtgttgtctaaactcaaacgcc-3'                                   |
| Reverse primer for miR-122-5p cloning    | 5'-cctgtgataagcttcctagcagtagctatttagtgtgataatggcgttgatagtttagacacaaac-3'                                  |
| Forward primer for SDC1 CDS cloning      | 5'-cctgataagcttatgaggcgcgggcgtctgg-3'                                                                     |
| Reverse primer for SDC1 CDS cloning      | 5'-cctgatctcgagtcaggcatagaattcctctctgttgggg-3'                                                            |
| Forward primer for SDC1 3'UTR cloning    | 5'-cctgatactagtcgaggagccatgcgcc-3'                                                                        |
| Reverse primer for SDC1 3'UTR cloning    | 5'-cctgataagcttttgcggaaatgacaagtaccg-3'                                                                   |
| Forward primer for SDC1 3'UTRmut cloning | 5'-cctgatgaattcgaagaccctggcagctcccagac-3'                                                                 |
| Reverse primer for SDC1 3'UTRmut cloning | 5'-cctgatctcgagaatggaggggaaggacaaagaagatagaga-3'                                                          |
| Forward primer 1 (fp1) in multiplex PCR  | 5'- aattctatgcctgacgaggagccatg -3'                                                                        |
| Forward primer 2 (fp2) in multiplex PCR  | 5'- aggggttctcgcataggac -3'                                                                               |
| RT primer for miRNA assay                | 5'- gcgagcacagaattaatcagactcactataggtttttttttvn -3'                                                       |
| Forward primer for miR-122-5p PCR        | 5'- tggagtgtgacaatggtgtttg -3'                                                                            |
| Forward primer for miR-423-3p PCR        | 5'- tgaggggcagagagcgagacttt -3'                                                                           |
| Forward primer for U6 RNA PCR            | 5'- gtgctcgttcggcagcaca -3'                                                                               |
| Universal reverse primer for PCR         | 5'-aattctaaattatctaataataggagatgaattcttatgatattac-3'                                                      |
| Forward primer to clone miR sponge       | 5'-cctgataagcttcaaacaccaacagacactccaccggcaaacaccaacagacactccaccggcaaacaccaacagacactccacc-3'               |
| Reverse primer to clone miR sponge       | 5'-cctgatctcgagccgggtgagtgtctgttgggtttgccgggtggagtgtctgttgggtttgccgggtggagtgtctgttgggtt-3'                |
| Forward primer to clone mock sponge      | 5'-cctgataagcttaagtttccagaaagctaacaccggaagtttccagaaagctaacaccggaagtttccagaaagctaacacc-3'                  |
| Reverse primer to clone mock sponge      | 5'-cctgatctcgagccgggttagctttctgaaaactccgggttagctttctgaaaactccgggttagctttctgaaaactccgggttagctttctgaaaac-3' |
